# Supplementary material
Source: PubMed Central journal article supplement (PMC1483042)

Fig. S1 Sato et al.

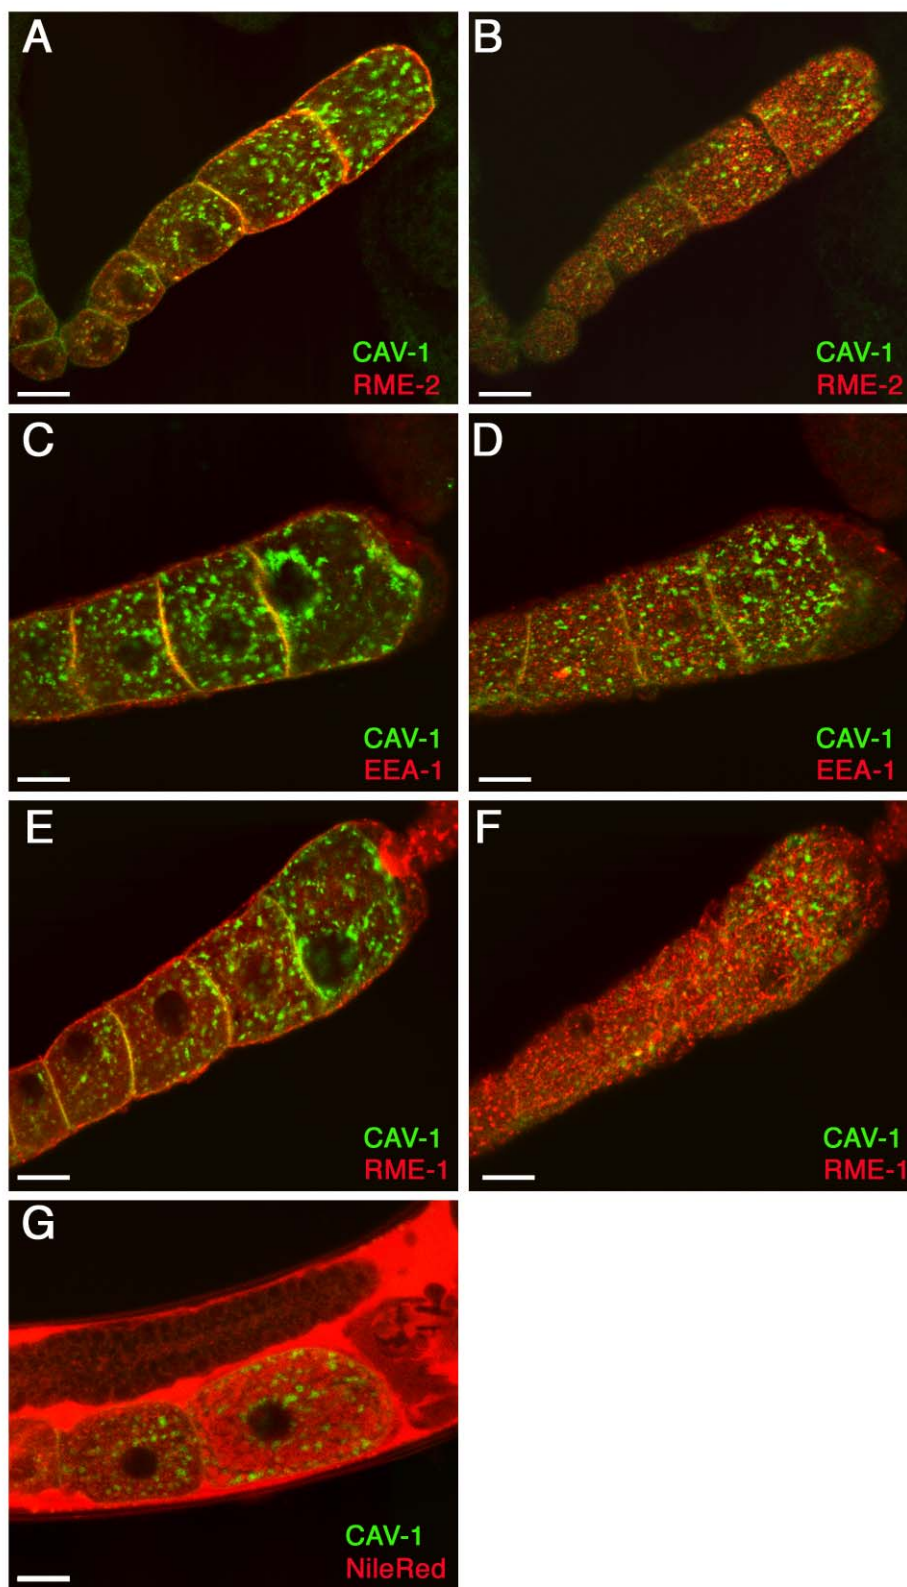

Supplement: mbc_E06-03-0211_1.pdf [file mbc_E06-03-0211_1.pdf]

Fig. S2 Sato et al.

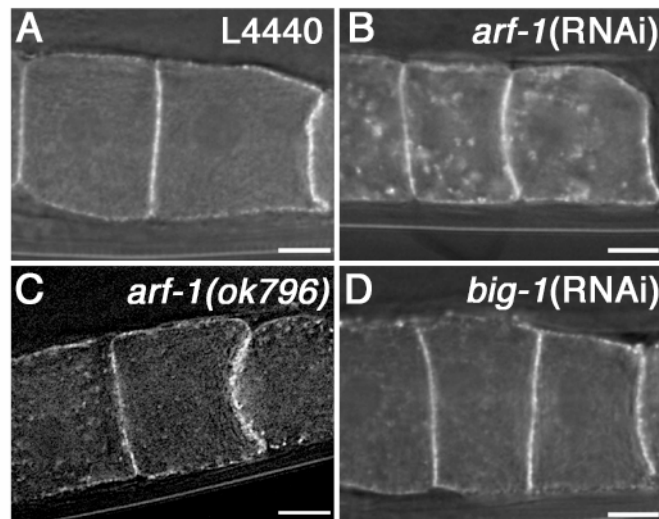

Supplement: mbc_E06-03-0211_2.pdf [file mbc_E06-03-0211_2.pdf]
